# Supplementary material for: Cancer exosomes trigger mesenchymal stem cell differentiation into pro-angiogenic and pro-invasive myofibroblasts
Source: PubMed Central journal article supplement (PMC4359250; doi:10.18632/oncotarget.2711), 2014-11-28
Supplement: oncotarget-06-715-s001.pdf [file oncotarget-06-715-s001.pdf]

## SUPPLEMENTARY FIGURES AND TABLE

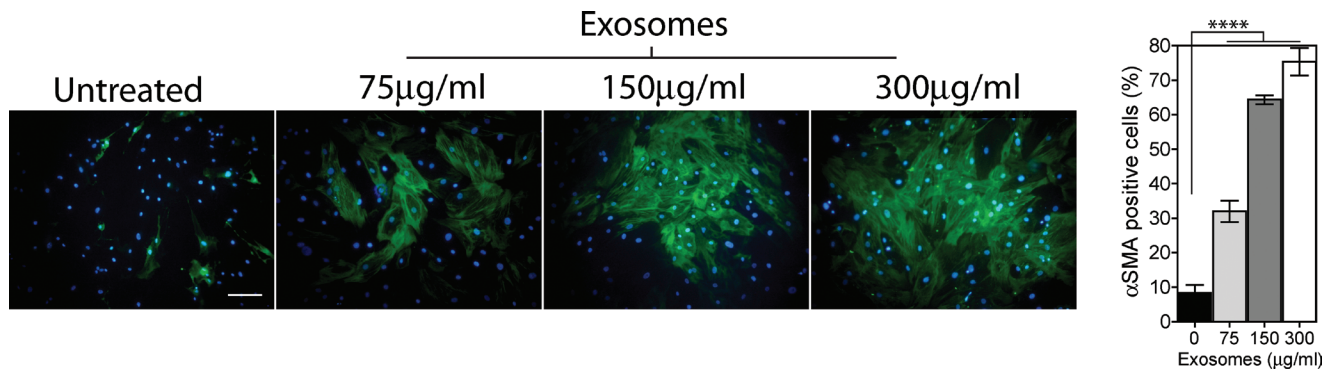

**Supplementary Figure S1: Exosome dose response.** M-MSC were treated with Du145 exosomes (0-300 µg/ml) and after 14 day incubation, cells were fixed and stained for αSMA (green) and DAPI (blue) (Scale, 100 µm). Bars, also presented as Fig. 2C show the mean (± SD) proportion of αSMA positive cells per field of view, from a total of 6 microscopic fields examined in duplicate wells per treatment.

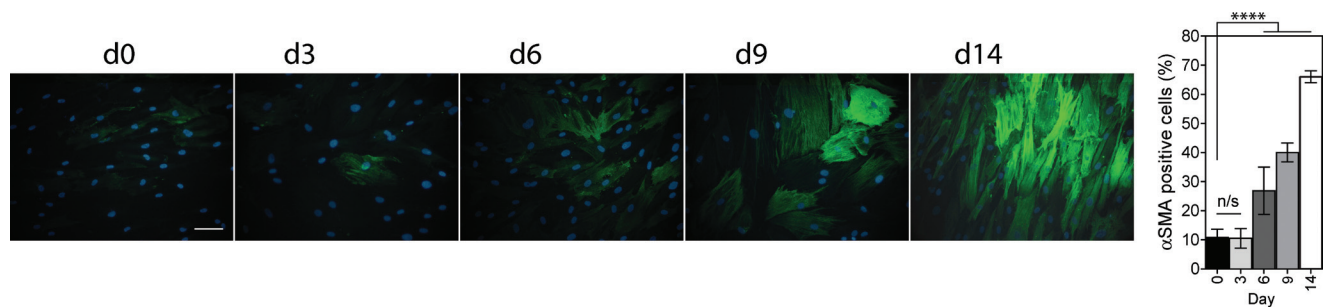

**Supplementary Figure S2: Kinetics of exosome-mediated MSC differentiation.** BM-MSC were treated with Du145 exosomes (at 150 µg/ml) and at indicated periods up to 14 days cells were fixed and stained for αSMA (green) and DAPI (blue) (Scale, 100 µm). Bars, also presented as Fig. 2D show the mean (± SD) proportion of αSMA positive cells per field of view, from a total of 6 microscopic fields examined in duplicate wells per treatment.

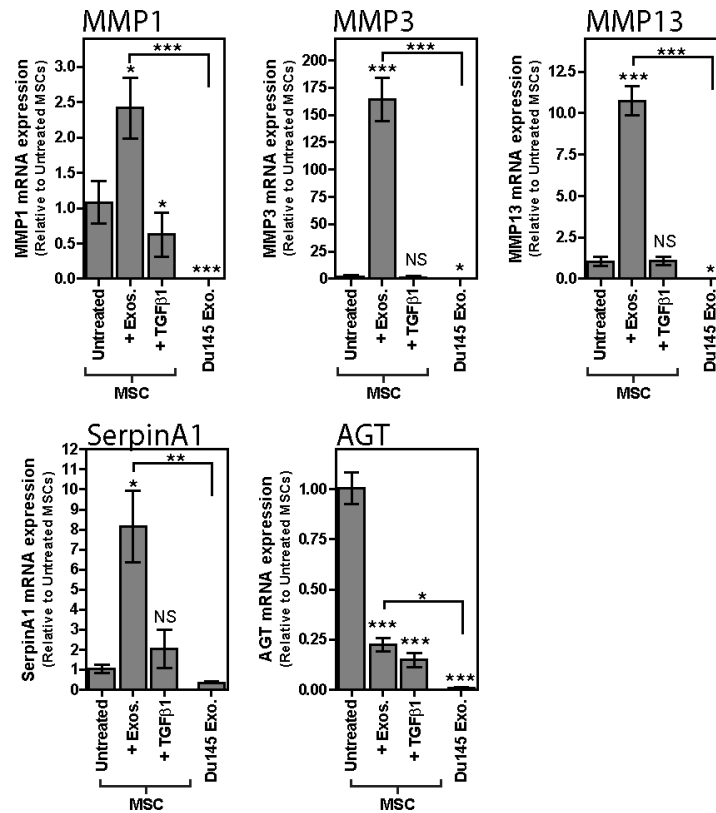

**Supplementary Figure S3: Exosomal mRNA does not account for changes in the MSC-transcriptome.** Total RNA (0.5  $\mu$ g), isolated from DU145 exosomes was reverse transcribed and analysed by TaqMan PCR gene expression assay for the specified transcripts. This was compared to the same amount of total RNA extracted from MSC stimulated with exosomes or TGF $\beta$  or left untreated as specified. This reveals the principal origin of these transcripts in exosome-activated MSC is of MSC and not exosome origin.

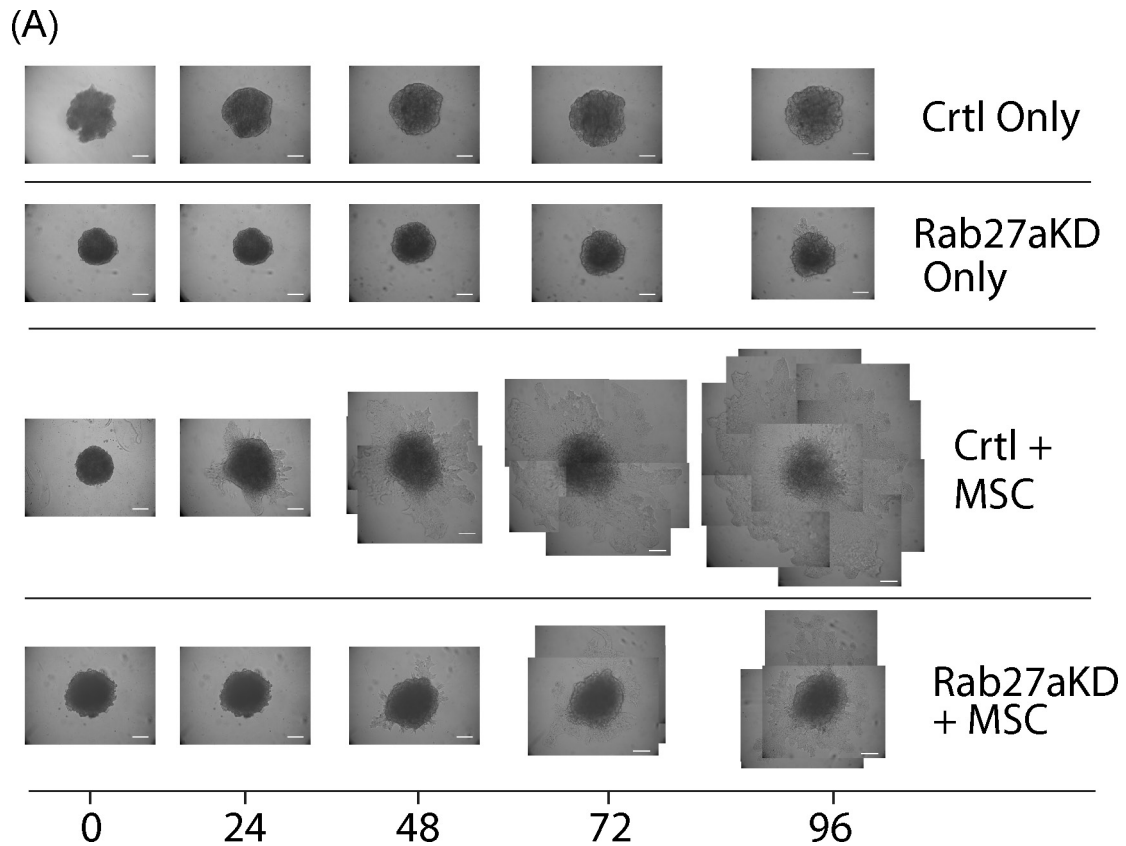

**Supplementary Figure S4: Spheroid invasion assay time-course.** 3D Spheroids were established using tumour cells alone (control Du145 or Rab27a-KD Du145 cells) or together with BM-MSC (at a ratio of 4 tumour cells to 1 BM-MSC), with a total of  $1 \times 10^4$  cells/spheroid. After 4 days, spheroids were transferred into fresh 96-well plates and Matrigel™ was added. The outgrowth of cells from the sphere was microscopically monitored at specified times up to 96 hours. Each condition had quadruplicate spheroids, and a single representative sphere from each condition is shown. Where the outgrowth extended beyond the visual field of the 10x objective used, multiple images were taken and these have been tiled to allow the full extent of outgrowth to be assessed.

**Supplementary Table S1: Raw data from the PCR-profiler array, depicting the mean fold change (from triplicates) and *p* value across the specified treatments for the array coverage of 83 transcripts.** Those highlighted in bolded text signify changes considered differentially expressed, according to the criteria of +3-fold change compared to un-stimulated BM-MSC and a *P* value <0.05

| mRNA    | Exosomes vs Untreated |                | TGFbeta vs untreated |                | Exosomes vs TGF-beta |                |
|---------|-----------------------|----------------|----------------------|----------------|----------------------|----------------|
|         | FOLD Change           | <i>p</i> Value | FOLD Change          | <i>p</i> Value | FOLD Change          | <i>p</i> Value |
| ACTA2   | 0.9834                | 0.9930         | 1.9776               | 0.0123         | 0.4973               | 0.0183         |
| AGT     | <b>0.2326</b>         | <b>0.0318</b>  | 0.4236               | 0.0572         | 0.5492               | 0.1434         |
| AKT1    | 0.8463                | 0.2831         | 0.7163               | 0.2052         | 1.1815               | 0.5812         |
| BCL2    | 0.3112                | 0.0042         | 0.3901               | 0.0003         | 0.7978               | 0.6274         |
| BMP7    | 1.0990                | 0.6299         | 1.4227               | 0.2531         | 0.7725               | 0.6699         |
| CAV1    | 0.5660                | 0.0144         | 0.8912               | 0.5112         | 0.6351               | 0.0334         |
| CCL11   | 0.4747                | 0.1508         | 0.3332               | 0.2757         | 1.4245               | 0.8367         |
| CCL2    | 1.6428                | 0.1743         | <b>0.2161</b>        | <b>0.0079</b>  | <b>7.6032</b>        | <b>0.0185</b>  |
| CCL3    | 1.4448                | 0.4934         | 0.6953               | 0.4092         | 2.0781               | 0.3863         |
| CCR2    | 0.7085                | 0.5419         | 0.8021               | 0.5720         | 0.8833               | 0.8901         |
| CEBPB   | 1.4727                | 0.0269         | 0.5894               | 0.1547         | 2.4988               | 0.0238         |
| COL1A2  | 1.4808                | 0.0005         | 1.9265               | 0.0023         | 0.7686               | 0.0250         |
| COL3A1  | 1.7498                | 0.0160         | 1.8150               | 0.0056         | 0.9641               | 0.7933         |
| CTGF    | 1.0502                | 0.6893         | 1.3088               | 0.0480         | 0.8024               | 0.0813         |
| CXCR4   | 2.6848                | 0.2667         | 2.5817               | 0.3556         | 1.0399               | 0.8841         |
| DCN     | 1.3845                | 0.1447         | 0.6306               | 0.0127         | 2.1953               | 0.0196         |
| EDN1    | 0.8315                | 0.0207         | 1.0616               | 0.3456         | 0.7833               | 0.0137         |
| EGF     | 1.6083                | 0.0991         | 2.4336               | 0.0250         | 0.6609               | 0.1004         |
| ENG     | 1.0461                | 0.7206         | 0.6580               | 0.0692         | 1.5899               | 0.1135         |
| FASLG   | 0.9232                | 0.8077         | 2.2583               | 0.3459         | 0.4088               | 0.3389         |
| GREM1   | 1.1101                | 0.1362         | 0.7078               | 0.0145         | 1.5684               | 0.0098         |
| HGF     | 0.4372                | 0.0009         | <b>0.1219</b>        | <b>0.0000</b>  | <b>3.5852</b>        | <b>0.0125</b>  |
| IFNG    | 0.9232                | 0.8077         | 1.4227               | 0.2531         | 0.6489               | 0.2473         |
| IL10    | 0.6114                | 0.9924         | 0.4446               | 0.1992         | 1.3751               | 0.4786         |
| IL13    | 1.6605                | 0.4195         | 1.5333               | 0.0908         | 1.0830               | 0.5322         |
| IL13RA2 | 0.5018                | 0.0323         | 0.6284               | 0.1111         | 0.7985               | 0.2892         |
| IL1A    | <b>9.1426</b>         | <b>0.0250</b>  | <b>22.2091</b>       | <b>0.0307</b>  | 0.4117               | 0.1334         |
| IL1B    | 0.8149                | 0.6342         | 0.9906               | 0.8526         | 0.8226               | 0.6590         |
| IL4     | 1.6118                | 0.7286         | 3.0142               | 0.3439         | 0.5347               | 0.4425         |

(Continued)

|          | Exosomes<br>vs<br>Untreated |               | TGFbeta vs<br>untreated |               | Exosomes<br>vs TGF-<br>beta |               |
|----------|-----------------------------|---------------|-------------------------|---------------|-----------------------------|---------------|
| IL5      | 0.7856                      | 0.3181        | <b>0.1545</b>           | <b>0.0124</b> | <b>5.0844</b>               | <b>0.0331</b> |
| ILK      | 0.7063                      | 0.0178        | 0.8300                  | 0.3770        | 0.8510                      | 0.4203        |
| INHBE    | <b>10.9874</b>              | <b>0.0161</b> | <b>26.8968</b>          | <b>0.0220</b> | 0.4085                      | 0.0848        |
| ITGA1    | 8.7288                      | 0.7019        | 0.8786                  | 0.7089        | 9.9350                      | 0.3637        |
| ITGA2    | <b>3.9709</b>               | <b>0.0024</b> | 2.5603                  | 0.0469        | 1.5509                      | 0.1547        |
| ITGA3    | 0.5088                      | 0.0172        | 0.7562                  | 0.3628        | 0.6728                      | 0.2717        |
| ITGAV    | 0.9610                      | 0.7879        | 0.8673                  | 0.6429        | 1.1080                      | 0.7745        |
| ITGB1    | 1.4364                      | 0.0299        | 1.2772                  | 0.0998        | 1.1246                      | 0.3636        |
| ITGB3    | 0.6096                      | 0.0200        | 0.9124                  | 0.4853        | 0.6682                      | 0.0716        |
| ITGB5    | 1.0796                      | 0.5151        | 0.9136                  | 0.6991        | 1.1818                      | 0.4560        |
| ITGB6    | <b>6.5460</b>               | <b>0.0017</b> | 7.4509                  | 0.2202        | 0.8786                      | 0.5316        |
| ITGB8    | <b>0.1929</b>               | <b>0.0145</b> | <b>0.1179</b>           | <b>0.0102</b> | 1.6359                      | 0.3754        |
| JUN      | 1.0620                      | 0.6512        | 1.0433                  | 0.7437        | 1.0179                      | 0.9078        |
| LOX      | 0.9665                      | 0.8121        | 1.1998                  | 0.1474        | 0.8056                      | 0.1798        |
| LTBP1    | 1.1981                      | 0.1146        | 1.1053                  | 0.4087        | 1.0839                      | 0.4323        |
| MMP1     | <b>3.3610</b>               | <b>0.0161</b> | 0.7416                  | 0.5907        | <b>4.5322</b>               | <b>0.0147</b> |
| MMP13    | <b>14.3312</b>              | <b>0.0013</b> | 1.8575                  | 0.0864        | <b>7.7155</b>               | <b>0.0018</b> |
| MMP14    | 1.3842                      | 0.1216        | 0.7739                  | 0.6900        | 1.7885                      | 0.1908        |
| MMP2     | 1.6081                      | 0.0662        | 1.0982                  | 0.5897        | 1.4643                      | 0.1878        |
| MMP3     | 42.4110                     | 0.0096        | 0.5927                  | 0.0992        | 71.5576                     | 0.0093        |
| MMP8     | 0.7126                      | 0.2574        | 1.4758                  | 0.1268        | 0.4829                      | 0.0273        |
| MMP9     | 3.2359                      | 0.3071        | 0.8412                  | 0.5845        | 3.8469                      | 0.2139        |
| MYC      | 1.8240                      | 0.0150        | 2.3413                  | 0.0015        | 0.7791                      | 0.0976        |
| NFKB1    | 0.9104                      | 0.5020        | 0.7172                  | 0.0188        | 1.2694                      | 0.1947        |
| PDGFA    | 0.6840                      | 0.0546        | 1.1063                  | 0.5935        | 0.6183                      | 0.1044        |
| PDGFB    | 0.9232                      | 0.8077        | 1.4227                  | 0.2531        | 0.6489                      | 0.2473        |
| PLAT     | 0.9863                      | 0.9482        | 0.7119                  | 0.1616        | 1.3854                      | 0.1979        |
| PLAU     | 1.2081                      | 0.3322        | 1.2233                  | 0.2320        | 0.9876                      | 0.9912        |
| PLG      | 0.7913                      | 0.3020        | 0.4363                  | 0.0443        | 1.8134                      | 0.0568        |
| SERPINA1 | <b>12.3713</b>              | <b>0.0147</b> | 0.9513                  | 0.8363        | <b>13.0050</b>              | <b>0.0155</b> |
| SERPINE1 | 1.0189                      | 0.8402        | 1.7801                  | 0.0849        | 0.5724                      | 0.0936        |
| SERPINH1 | 1.4507                      | 0.0088        | 2.6688                  | 0.0013        | 0.5436                      | 0.0039        |
| SMAD2    | 0.7627                      | 0.0502        | 0.8805                  | 0.2932        | 0.8662                      | 0.3487        |
| SMAD3    | 0.3752                      | 0.0483        | <b>0.1604</b>           | <b>0.0098</b> | 2.3392                      | 0.1149        |

(Continued)

|        | Exosomes<br>vs<br>Untreated |        | TGFbeta vs<br>untreated |               | Exosomes<br>vs TGF-<br>beta |               |
|--------|-----------------------------|--------|-------------------------|---------------|-----------------------------|---------------|
| SMAD4  | 0.8963                      | 0.5901 | 0.7615                  | 0.0187        | 1.1771                      | 0.3504        |
| SMAD6  | 0.6809                      | 0.2149 | <b>0.3109</b>           | <b>0.0045</b> | 2.1899                      | 0.0892        |
| SMAD7  | 1.3734                      | 0.1058 | 0.7495                  | 0.3231        | 1.8326                      | 0.0555        |
| SNAI1  | 2.1055                      | 0.0627 | 0.9437                  | 0.8715        | 2.2312                      | 0.1779        |
| SP1    | 0.9925                      | 0.8698 | 0.6750                  | 0.3475        | 1.4703                      | 0.2878        |
| STAT1  | 1.5344                      | 0.0957 | 0.7639                  | 0.2424        | 2.0086                      | 0.0086        |
| STAT6  | 0.6487                      | 0.6062 | 1.4970                  | 0.8734        | 0.4334                      | 0.5621        |
| TGFB1  | 1.5107                      | 0.0941 | 1.6242                  | 0.1965        | 0.9301                      | 0.6896        |
| TGFB2  | 1.2627                      | 0.0088 | 1.9774                  | 0.0003        | 0.6386                      | 0.0011        |
| TGFB3  | 1.0061                      | 0.9888 | 0.3261                  | 0.0265        | <b>3.0848</b>               | <b>0.0180</b> |
| TGFBR1 | 1.0905                      | 0.6675 | 0.5638                  | 0.0919        | 1.9341                      | 0.0711        |
| TGFBR2 | 0.6924                      | 0.1494 | 0.4326                  | 0.0233        | 1.6007                      | 0.0762        |
| TGIF1  | 1.5901                      | 0.0037 | 1.4112                  | 0.0296        | 1.1268                      | 0.2588        |
| THBS1  | 0.7754                      | 0.0959 | 0.8742                  | 0.5876        | 0.8870                      | 0.5287        |
| THBS2  | 0.9094                      | 0.6834 | 0.8009                  | 0.6788        | 1.1354                      | 0.8971        |
| TIMP1  | 2.2392                      | 0.0012 | 2.7349                  | 0.0000        | 0.8188                      | 0.0391        |
| TIMP2  | 0.5663                      | 0.2508 | 0.5551                  | 0.2430        | 1.0201                      | 0.9224        |
| TIMP3  | 0.6663                      | 0.1198 | 1.0161                  | 0.9549        | 0.6557                      | 0.0841        |
| TIMP4  | 0.8829                      | 0.5808 | 1.2689                  | 0.0813        | 0.6958                      | 0.0986        |
| TNF    | 0.5817                      | 0.3729 | 2.5033                  | 0.3031        | 0.2324                      | 0.1517        |
| VEGFA  | 1.8100                      | 0.0716 | 2.0893                  | 0.0411        | 0.8663                      | 0.6159        |

Bold text- highlight mRNA considered differentially expressed according to the criteria of  $\pm 3x$  fold change and a  $p$ -value of  $<0.05$
